# Supplementary material for: S-nitrosylated PARIS Leads to the Sequestration of PGC-1α into Insoluble Deposits in Parkinson’s Disease Model
Source: MDPI journal article supplement (doi:10.3390/cells11223682), 2022-11-19
Supplement: s1 [file s1]

# S-nitrosylated PARIS leads to the sequestration of PGC-1 $\alpha$ into insoluble deposits in Parkinson's disease model

Hanna Kim, Ji-Yeong Lee, Soo Jeong Park, Eunsang Kwag, Jihye Kim, and Joo-Ho Shin

\*Joo-Ho Shin

Email: [jshin24@skku.edu](mailto:jshin24@skku.edu)

**This PDF file includes:**

Tables S1 to S2

Table S1. Antibodies used in this study.

| Reagent                                                              | Source                    | Identifier     |
|----------------------------------------------------------------------|---------------------------|----------------|
| Rabbit polyclonal anti-ZNF746 (1:5000)                               | Proteintech               | CAT#24543-1-AP |
| HRP-Streptavidin Conjugate (1:3000)                                  | Invitrogen                | CAT#43-4323    |
| Mouse monoclonal anti-beta Actin [AC-15](HRP) (1:10000)              | Abcam                     | CAT#ab49900    |
| Anti-S-nitrosocysteine antibody [HY8E12] (1:1000)                    | Abcam                     | CAT#ab94930    |
| Mouse monoclonal anti-PGC-1 $\alpha$ (1:1000)                        | Calbiochem                | CAT#ST1202     |
| Rabbit polyclonal anti-Tyrosine Hydroxylase (1:1000)                 | Novus Biologicals         | CAT#NB300-109  |
| Mouse monoclonal anti- $\alpha$ -Synuclein Phospho (Ser129) (1:1000) | Biolegend                 | CAT#825702     |
| Rabbit polyclonal anti-NRF1 (1:1000)                                 | Abcam                     | CAT#ab34682    |
| Mouse monoclonal anti-Parkin (Prk8) (1:1000)                         | Cell Signaling Technology | CAT#4211       |
| Mouse monoclonal anti-GFP(B-2) (1:3000)                              | SANTA CRUZ BIOTECHNOLOGY  | CAT#sc-9996    |
| Mouse monoclonal ANTI-FLAG M2 (1:5000)                               | Sigma-Aldrich             | CAT#F1804      |
| donkey anti-goat IgG-HRP (1:5000)                                    | SANTA CRUZ BIOTECHNOLOGY  | CAT#sc-2020    |
| c-Abl Antibody (1:3000)                                              | Cell Signaling Technology | CAT#2862       |
| Phospho-c-Abl (Tyr245) Antibody (1:3000)                             | Cell Signaling Technology | CAT#2861       |
| Donkey Anti-Rabbit IgG H&L (Alexa Fluor® 488) (1:500)                | Abcam                     | CAT#ab150073   |
| Donkey Anti-Mouse IgG H&L (Alexa Fluor® 594) (1:500)                 | Abcam                     | CAT#ab150108   |

Table S2. Primers used in this study.

| Target genes   | Use              |   | Human Primers (5' – 3')                     |
|----------------|------------------|---|---------------------------------------------|
| $\beta$ -actin | mt DNA           | F | 5'-CATGTGCAAGGCCGGCTTCG-3'                  |
|                |                  | R | 5'-CTGGGTCATCTTCTCGCGGT-3'                  |
| ND1            | mt DNA           | F | 5'-TCTCACCATCGCTCTTCTAC-3'                  |
|                |                  | R | 5'-TTGGTCTCTGCTAGTGTGGA-3'                  |
| COX            | mt DNA           | F | 5'-TTCGCCGACCGTTGACTATTCTCT-3'              |
|                |                  | R | 5'-AAGATTATTACAAATGCATGGGC-3'               |
| PARIS (C265S)  | SD               | F | 5'-CAT CCC TCT TCA GCA AGC TCG GAC GGG A-3' |
|                |                  | R | 5'-TCC CGT CCG AGC TTG CTG AAG AGG GAT G-3' |
| PARIS (C265W)  | SD               | F | 5'-CCT CTT CAG CAT GGT CGG ACG GGA CCC-3'   |
|                |                  | R | 5'-GGG TCC CGT CCG ACC ATG CTG AAG AGG-3'   |
| Fragment 1     | PARIS truncation | F | 5'-GAATTCatggccgaggcggtcgcg-3'              |
|                |                  | R | 5'-GTCGACtcagatccagaagttcctgtt-3'           |
| Fragment 2     | PARIS truncation | F | 5'-GAATTCctgcggctgccccgggc-3'               |
|                |                  | R | 5'-GTCGACtcaaacatctggaatcttggg-3'           |
| Fragment 3     | PARIS truncation | F | 5'-GAATTCcctgtggaccccagtgcca-3'             |
|                |                  | R | 5'-GTCGACtcaactaggaagaaccgtgt-3'            |
| Fragment 4     | PARIS truncation | F | 5'-GAATTCcctgcccaggaaggagcc-3'              |
|                |                  | R | 5'-GTCGACtcatggccttggggcctggct-3'           |
| Fragment 5     | PARIS truncation | F | 5'-GAATTCttcaacgaaccctgtaaa-3G              |
|                |                  | R | 5'-GTCGACtcagctgccatcccgtgcgct-3G           |
| Fragment 6     | PARIS truncation | F | 5'-GAATTCgcccttcggtgtggggag-3A              |
|                |                  | R | 5'-GTCGACtcacatgtccccgccatc-3T              |
| PPARGC1A       | RTQ              | F | 5'-TCCTCACAGAGACACTAGACA-3C                 |
|                |                  | R | 5'-CTGGTGCCAGTAAGAGCTTCT-3T                 |
| Target genes   | Use              |   | Mouse Primers (5' – 3')                     |
| GAPDH          | mt DNA           | F | 5'-TGGGTGGAGTGTCTTTATCC-3'                  |
|                |                  | R | 5'-TATGCCCCGAGGACAATAAGG-3'                 |

|          |        |   |                               |
|----------|--------|---|-------------------------------|
| COX      | mt DNA | F | 5'-GCCTTTCAGGAATACCACGA-3'    |
|          |        | R | 5'-AGGTTGGTTCCTCGAATGTG-3'    |
| CYTB     | mt DNA | F | 5'-ATTCCTCATGTCTGGACGAG-3'    |
|          |        | R | 5'-ACTGAGAAGGCCCCCTCAAAT-3'   |
| PPARGC1A | RTQ    | F | 5'-AGCCGTGACCACTGACAACGAG-3'  |
|          |        | R | 5'-GCTGCATGGTTCTGAGTGCTAAG-3' |
| NRF1     | RTQ    | F | 5'-GTTGGTACAGGGGCAACAGT-3'    |
|          |        | R | 5'-TCGTCTGGATGGTCATTTCA-3'    |
| TFAM     | RTQ    | F | 5'-CCAAAAAGACCTCGTTCAGC-3'    |
|          |        | R | 5'-CTTCAGCCATCTGCTCTTCC-3'    |
